# Supplementary material for: HERG1 functions as an oncogene in pancreatic cancer and is downregulated by miR-96
Source: PubMed Central journal article supplement (PMC4170607; doi:10.18632/oncotarget.2200), 2014-07-15
Supplement: oncotarget-05-5832-s001.pdf [file oncotarget-05-5832-s001.pdf]

## SUPPLEMENTARY FIGURES AND TABLES

Figure S1

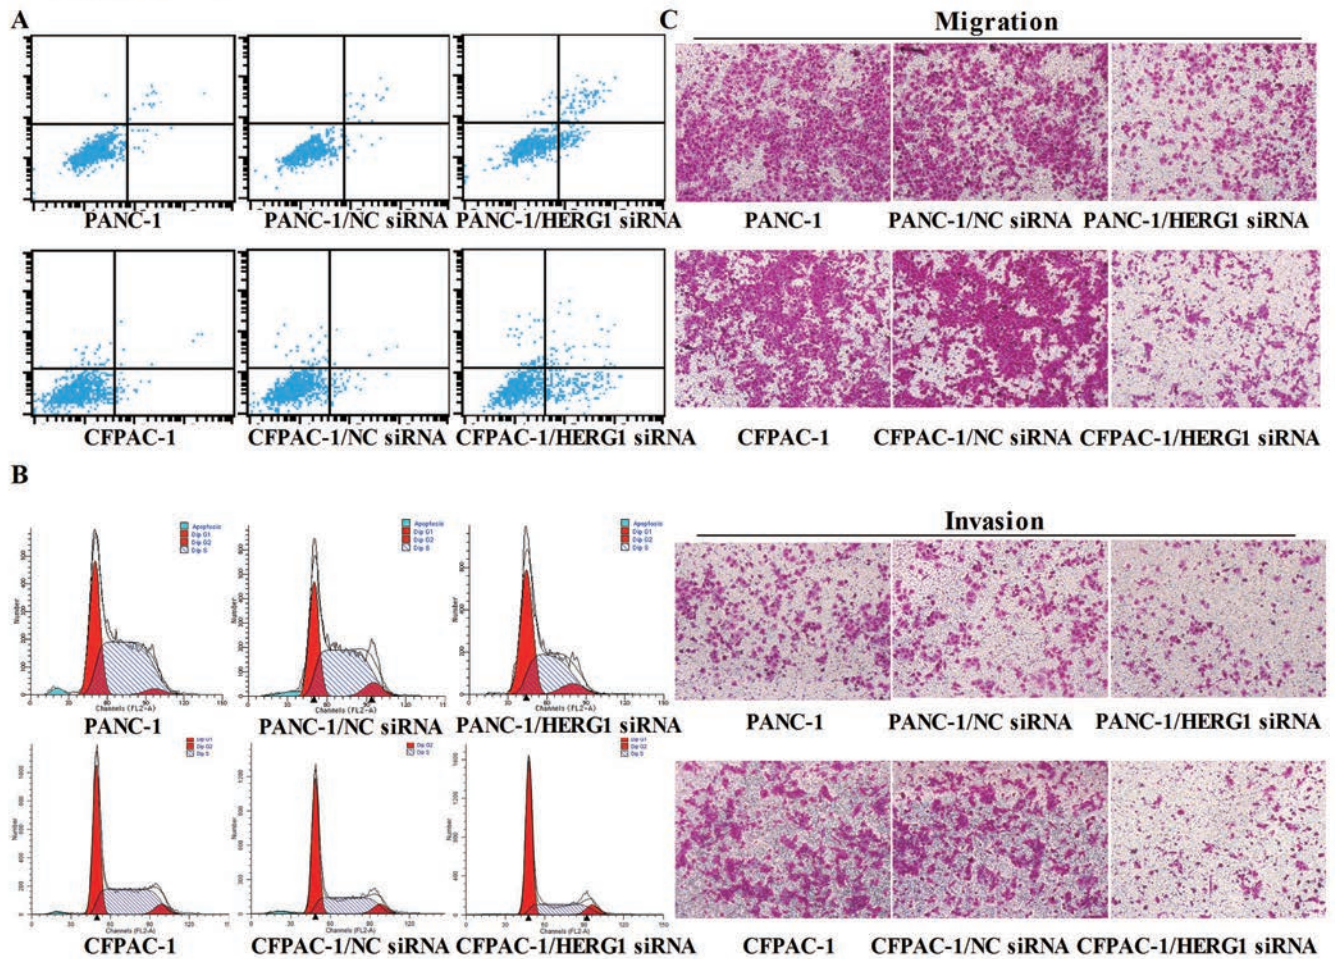

**Supplementary Figure S1: HERG1 siRNA silencing inhibits pancreatic cancer progression *in vitro*.** (A) Flow cytometry analysis of apoptosis in PANC-1 and CFPAC-1 cells after HERG1 siRNA, NC siRNA transfection or without treatment; (B) Flow cytometry analysis of cell cycle progression in PANC-1 and CFPAC-1 cells after HERG1 siRNA, NC siRNA transfection or without treatment; (C) Migration and invasion assay analysis of PANC-1 and CFPAC-1 cells after HERG1 siRNA, NC siRNA transfection or no treatment. Magnification,  $\times 100$ .

**Figure S2**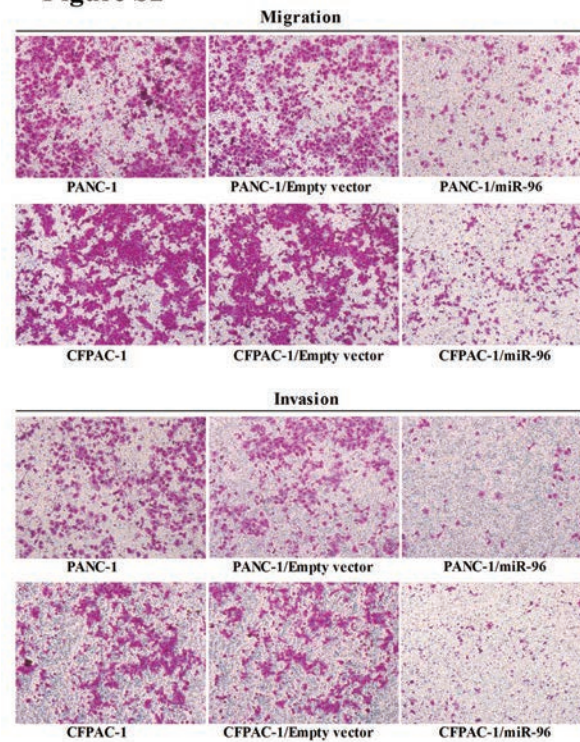

**Supplementary Figure S2: Overexpression of miR-96 inhibits pancreatic cancer cell migration, invasion *in vitro*.** Migration and invasion assay analysis of PANC-1 and CFPAC-1 cells after transfection with pre-miR-96 plasmid or empty vector or without treatment. Magnification,  $\times 100$ .

**Supplementary Table S1.** The miRNAs potentially targeting the 3'-UTR of HERG1

| miRNAs<br>Position of HERG1 3'-UTR  | miRNA (top) and predicted consequential pairing of target region (bottom) |
|-------------------------------------|---------------------------------------------------------------------------|
| hsa-miR-96<br>Position 427-440      | ACACGAUCACGGUUU<br>TGTGCT—GTGCTAAG                                        |
| hsa-miR-105<br>Position 60-68       | UCGUAAACU<br>GGCATTGG                                                     |
| hsa-miR-152<br>Position 419-425     | AAGACAG<br>TTCTGTT                                                        |
| hsa-miR-199a-5p<br>Position 382-390 | UUGUGACCC<br>AACACTGGG                                                    |
| hsa-miR-220<br>Position 193-199     | GCCACAC<br>TGGTGTG                                                        |
| hsa-miR-329<br>Position 195-201     | CCACACA<br>GGTGTGT                                                        |
| hsa-miR-331-5p<br>Position 90-95    | AGGGAC<br>TCCCTG                                                          |
| hsa-miR-592<br>Position 116-123     | AACUGUGU<br>TTGACACA                                                      |
| hsa-let-7e<br>Position 435-440      | UUCGAU<br>AAGCTA                                                          |
| hsa-let-7g<br>Position 325-333      | GGACAUGU<br>TCTGTACA                                                      |

**Supplementary Table S2.** Primer pairs and thermal cycling conditions

|                   |                            |                                                                                                                                                                                                 |
|-------------------|----------------------------|-------------------------------------------------------------------------------------------------------------------------------------------------------------------------------------------------|
| <b>HERG1</b>      | primers                    | 5'-CGCACCATTAGCAAGATTCCC-3'<br>5'-AAGACAGCCGTGTAGATGACCAG-3'                                                                                                                                    |
|                   | thermal cycling conditions | denaturing phase at 95°C for 5 min, 35 cycles of 1 min at 94°C, 1 min annealing phase at 58°C, and a 1 min extension phase at 72°C, with a final extension phase of 10 min at 72°C              |
| <b>beta-actin</b> | primers                    | 5'-TGCGTGACATTAAGGAGAAGC-3'<br>5'-GCCAGGGTACATGGTGGTG-3'                                                                                                                                        |
|                   | thermal cycling conditions | denaturing phase at 95°C for 5 min, 35 cycles of 15 seconds at 95°C, 30 seconds annealing phase at 65°C, and 30 seconds extension phase at 58°C, with a final extension phase of 10 min at 72°C |

**Supplementary Table S3.** Oligonucleotide sequences of four different HERG1 siRNAs and a negative control siRNA

| Oligo name       | oligo sequences 5'to 3'                                               |
|------------------|-----------------------------------------------------------------------|
| HERG1 siRNA-1-F  | TGCTGCGATGAGGTCCACCACAGCCAGTTTTGGCCACTGACTGACTG<br>GCTGTGGGACCTCATCG  |
| HERG1 siRNA -1-R | CCTGCGATGAGGTCCCACAGCCAGTCAGTCAGTGGCCAAAACCTGGCT<br>GTGGTGGACCTCATCGC |
| HERG1 siRNA -2-F | TGCTGATGTGTGGCTGCTCCATGTTGGTTTTGGCCACTGACTGACCAA<br>CATGGCAGCCACACAT  |
| HERG1 siRNA -2-R | CCTGATGTGTGGCTGCCATGTTGGTCAGTCAGTGGCCAAAACCAACA<br>TGGAGCAGCCACACATC  |
| HERG1 siRNA -3-F | TGCTGTGCTGTTGTAGGGTTTGCTAGTTTTGGCCACTGACTGACTAG<br>GCAAAC TACAACAGCA  |
| HERG1 siRNA -3-R | CCTGTGCTGTTGTAGTTTGCCTAGTCAGTCAGTGGCCAAAAC TAGGC<br>AAACCCTACAACAGCAC |
| HERG1 siRNA -4-F | TGCTGTTTGCAGTGCTGCAGCAGTGAGTTTTGGCCACTGACTGACT<br>ACTGCTAGCACTGCAAA   |
| HERG1 siRNA -4-R | CCTGTTTGCAGTGCTAGCAGTGAGTCAGTCAGTGGCCAAAAC TCAC<br>TGCTGCAGCACTGCAAAC |
| Negative-F       | TgctgAAATGTACTGCGCGTGGAGACGTTTTGGCCACTGACTGACGTCT<br>CCACGCAGTACATTT  |
| Negative-R       | CetgAAATGTACTGCGTGGAGACGTCAGTCAGTGGCCAAAACGTCTCC<br>ACGCGCAGTACATTTc  |

**Supplementary Table S4.** Plasmid vector screening: silencing efficiency of four different HERG1 siRNAs and a negative control siRNA

| HERG1                     | siRNA-1  | siRNA-2  | siRNA-3   | siRNA-4  | NC siRNA |
|---------------------------|----------|----------|-----------|----------|----------|
| $\Delta$ Ct               | 13.4335  | 13.6975  | 13.3029   | 13.49777 | 11.18273 |
| $\Delta\Delta$ Ct         | 2.7465   | 3.0105   | 2.6159    | 2.810767 | 0        |
| 2- $\Delta\Delta$ Ct      | 0.149012 | 0.124094 | 0.1631307 | 0.14252  | 1        |
| Interferential efficiency | 0.850988 | 0.875906 | 0.8368693 | 0.85748  | 0        |

**Supplementary Table S5.** The oligonucleotide sequences of pre-miR-96 forward and reverse PCR primers

| Oligo name   | oligo sequences 5'to 3'       |
|--------------|-------------------------------|
| pre-miR-96-F | TCTGGGTACCGCACTGGTAGAATTCCTG  |
| pre-miR-96-R | CCTTTCTAGACCACGGCACCATTTCAGGA |
